# Supplementary material for: In Silico target fishing: addressing a “Big Data” problem by ligand-based similarity rankings with data fusion
Source: PubMed Central journal article supplement (PMC4068908; doi:10.1186/1758-2946-6-33), 2014-06-18
Supplement: 1758-2946-6-33-S1.pdf [file 1758-2946-6-33-S1.pdf]

# ***In Silico* Target Fishing: Addressing a “Big Data” Problem by Ligand-based Similarity Rankings with Data Fusion**

Xian Liu, Yuan Xu, Shanshan Li, Yulan Wang, Jianlong Peng, Cheng Luo, Xiaomin Luo\*, Mingyue Zheng\*, Kaixian Chen, Hualiang Jiang

## **Additional file 1**

**Table S1.** The  $PR_n$  and  $RE_n$  values of 3NN and SEA for Drugbank and TTD validation sets respectively.

| n  | Drugbank |       |        |       | TTD    |       |        |       |
|----|----------|-------|--------|-------|--------|-------|--------|-------|
|    | $PR_n$   |       | $RE_n$ |       | $PR_n$ |       | $RE_n$ |       |
|    | 3NN      | SEA   | 3NN    | SEA   | 3NN    | SEA   | 3NN    | SEA   |
| 1  | 0.475    | 0.319 | 0.094  | 0.070 | 0.396  | 0.282 | 0.170  | 0.126 |
| 2  | 0.405    | 0.253 | 0.138  | 0.097 | 0.312  | 0.228 | 0.237  | 0.179 |
| 3  | 0.362    | 0.217 | 0.171  | 0.119 | 0.268  | 0.192 | 0.289  | 0.217 |
| 4  | 0.327    | 0.178 | 0.193  | 0.125 | 0.231  | 0.157 | 0.317  | 0.230 |
| 5  | 0.300    | 0.150 | 0.212  | 0.128 | 0.203  | 0.132 | 0.347  | 0.238 |
| 6  | 0.279    | 0.128 | 0.230  | 0.129 | 0.179  | 0.113 | 0.366  | 0.246 |
| 7  | 0.259    | 0.112 | 0.243  | 0.130 | 0.159  | 0.099 | 0.380  | 0.250 |
| 8  | 0.242    | 0.099 | 0.255  | 0.131 | 0.145  | 0.088 | 0.392  | 0.251 |
| 9  | 0.231    | 0.088 | 0.266  | 0.131 | 0.132  | 0.079 | 0.401  | 0.253 |
| 10 | 0.221    | 0.080 | 0.276  | 0.132 | 0.123  | 0.071 | 0.412  | 0.254 |
| 11 | 0.211    | 0.073 | 0.283  | 0.132 | 0.114  | 0.065 | 0.421  | 0.254 |
| 12 | 0.201    | 0.068 | 0.292  | 0.132 | 0.107  | 0.060 | 0.429  | 0.254 |
| 13 | 0.193    | 0.063 | 0.296  | 0.132 | 0.101  | 0.055 | 0.439  | 0.255 |
| 14 | 0.186    | 0.058 | 0.302  | 0.133 | 0.096  | 0.052 | 0.445  | 0.255 |
| 15 | 0.179    | 0.054 | 0.307  | 0.133 | 0.091  | 0.048 | 0.457  | 0.255 |
| 16 | 0.173    | 0.051 | 0.314  | 0.133 | 0.088  | 0.045 | 0.465  | 0.255 |
| 17 | 0.169    | 0.048 | 0.319  | 0.133 | 0.084  | 0.042 | 0.471  | 0.255 |
| 18 | 0.164    | 0.045 | 0.324  | 0.133 | 0.080  | 0.040 | 0.477  | 0.255 |
| 19 | 0.158    | 0.043 | 0.327  | 0.133 | 0.077  | 0.038 | 0.480  | 0.255 |
| 20 | 0.153    | 0.041 | 0.330  | 0.133 | 0.074  | 0.036 | 0.483  | 0.256 |

**Table S2.** The  $F_n$  score of 3NN and SEA for the Drugbank and TTD sets respectively.

| <b>n</b> | <b>Drugbank</b> |            | <b>TTD</b> |            |
|----------|-----------------|------------|------------|------------|
|          | <b>3NN</b>      | <b>SEA</b> | <b>3NN</b> | <b>SEA</b> |
| 1        | 0.157           | 0.114      | 0.238      | 0.174      |
| 2        | 0.206           | 0.140      | 0.269      | 0.201      |
| 3        | 0.232           | 0.154      | 0.278      | 0.203      |
| 4        | 0.243           | 0.147      | 0.267      | 0.187      |
| 5        | 0.249           | 0.138      | 0.256      | 0.170      |
| 6        | 0.252           | 0.129      | 0.240      | 0.155      |
| 7        | 0.251           | 0.120      | 0.224      | 0.142      |
| 8        | 0.248           | 0.112      | 0.212      | 0.130      |
| 9        | 0.247           | 0.106      | 0.199      | 0.120      |
| 10       | 0.246           | 0.100      | 0.189      | 0.111      |
| 11       | 0.242           | 0.094      | 0.180      | 0.104      |
| 12       | 0.238           | 0.090      | 0.171      | 0.097      |
| 13       | 0.234           | 0.085      | 0.164      | 0.091      |
| 14       | 0.230           | 0.081      | 0.157      | 0.086      |
| 15       | 0.226           | 0.077      | 0.152      | 0.081      |
| 16       | 0.223           | 0.074      | 0.147      | 0.077      |
| 17       | 0.221           | 0.070      | 0.142      | 0.073      |
| 18       | 0.217           | 0.068      | 0.137      | 0.069      |
| 19       | 0.213           | 0.065      | 0.132      | 0.066      |
| 20       | 0.209           | 0.062      | 0.128      | 0.063      |
